# Supplementary material
Source: publisher site journal article supplement (https://www.dovepress.com/article/544191)
Supplement: Supplementary file 1 [file 544191%20Revised%20Supplementary%20Table%201-2.docx]

Supplementary table 1 Functional connectivity comparison of ROI-self

| ROI Name | Before Treatment | After Treatment | T-test | p (FDR corrected ) |
| --- | --- | --- | --- | --- |
| L PMC and SMA~L PMC and SMA | 0.35±0.22 | 0.32±0.25 | 0.540 | 0.81 |
| R PMC and SMA~R PMC and SMA | 0.38±0.31 | 0.24±0.12 | 1.618 | 0.54 |
| L Fp~L Fp | 0.50±0.28 | 0.35±0.31 | 2.275 | 0.27 |
| R Fp~R Fp | 0.47±0.23 | 0.40±0.27 | 1.062 | 0.75 |
| L DLPFC~L DLPFC | 0.65±0.40 | 0.36±0.36 | 2.270 | 0.27 |
| R DLPFC~R DLPFC | 0.68±0.39 | 0.75±0.37 | -0.507 | 0.81 |
| L S1~L S1 | 0.81±0.54 | 0.72±0.52 | 0.451 | 0.81 |
| R S1~R S1 | 0.70±0.57 | 0.61±0.44 | 0.426 | 0.81 |
| L M1~L M1 | 0.00±0.00 | 0.00±0.00 | N/A | 1 |
| R M1~R M1 | 0.00±0.00 | 0.00±0.00 | N/A | 1 |
| L Association area~L Association area | 0.79±0.42 | 0.59±0.54 | 1.194 | 0.74 |
| R Association area~R Association area | 0.80±0.62 | 0.61±0.62 | 0.811 | 0.81 |

Supplementary table 2 Functional connectivity comparison between ROI

| ROI Name | Before Treatment | After Treatment | T-test | p (FDR corrected ) |
| --- | --- | --- | --- | --- |
| L PMC and SMA~R PMC and SMA | 0.28±0.20 | 0.20±0.14 | 1.893 | 0.53 |
| L PMC and SMA~L Fp | 0.28±0.16 | 0.18±0.15 | 1.954 | 0.53 |
| L PMC and SMA~R Fp | 0.25±0.11 | 0.19±0.17 | 1.388 | 0.53 |
| L PMC and SMA~L DLPFC | 0.34±0.22 | 0.16±0.18 | 1.997 | 0.53 |
| L PMC and SMA~R DLPFC | 0.29±0.15 | 0.19±0.13 | 1.958 | 0.53 |
| L PMC and SMA~L S1 | 0.42±0.22 | 0.31±0.28 | 1.280 | 0.54 |
| L PMC and SMA~R S1 | 0.34±0.22 | 0.21±0.24 | 1.730 | 0.53 |
| L PMC and SMA~L M1 | 0.38±0.25 | 0.27±0.27 | 1.264 | 0.54 |
| L PMC and SMA~R M1 | 0.29±0.27 | 0.19±0.24 | 0.984 | 0.55 |
| L PMC and SMA~L Association area | 0.35±0.19 | 0.29±0.29 | 0.891 | 0.58 |
| L PMC and SMA~R Association area | 0.34±0.25 | 0.12±0.24 | 2.511 | 0.53 |
| R PMC and SMA~L Fp | 0.21±0.15 | 0.18±0.11 | 0.625 | 0.64 |
| R PMC and SMA~R Fp | 0.23±0.13 | 0.22±0.12 | 0.271 | 0.82 |
| R PMC and SMA~L DLPFC | 0.25±0.19 | 0.17±0.14 | 1.339 | 0.53 |
| R PMC and SMA~R DLPFC | 0.24±0.18 | 0.27±0.16 | -0.743 | 0.61 |
| R PMC and SMA~L S1 | 0.34±0.31 | 0.23±0.21 | 1.345 | 0.53 |
| R PMC and SMA~R S1 | 0.43±0.29 | 0.30±0.17 | 1.610 | 0.53 |
| R PMC and SMA~L M1 | 0.37±0.37 | 0.22±0.20 | 1.394 | 0.53 |
| R PMC and SMA~R M1 | 0.34±0.39 | 0.26±0.24 | 0.708 | 0.61 |
| R PMC and SMA~L Association area | 0.29±0.29 | 0.21±0.18 | 1.077 | 0.55 |
| R PMC and SMA~R Association area | 0.31±0.28 | 0.22±0.12 | 1.052 | 0.55 |
| L Fp~R Fp | 0.68±0.46 | 0.54±0.46 | 2.563 | 0.53 |
| L Fp~L DLPFC | 0.45±0.22 | 0.34±0.30 | 1.063 | 0.55 |
| L Fp~R DLPFC | 0.38±0.30 | 0.31±0.23 | 1.206 | 0.54 |
| L Fp~L S1 | 0.34±0.21 | 0.22±0.21 | 1.669 | 0.53 |
| L Fp~R S1 | 0.27±0.14 | 0.17±0.20 | 1.757 | 0.53 |
| L Fp~L M1 | 0.23±0.17 | 0.13±0.17 | 1.393 | 0.53 |
| L Fp~R M1 | 0.20±0.23 | 0.10±0.18 | 0.974 | 0.55 |
| L Fp~L Association area | 0.33±0.18 | 0.19±0.19 | 2.385 | 0.53 |
| L Fp~R Association area | 0.26±0.22 | 0.16±0.19 | 1.660 | 0.53 |
| R Fp~L DLPFC | 0.36±0.16 | 0.26±0.28 | 1.017 | 0.55 |
| R Fp~R DLPFC | 0.42±0.24 | 0.41±0.26 | 0.073 | 0.94 |
| R Fp~L S1 | 0.33±0.21 | 0.25±0.21 | 0.920 | 0.58 |
| R Fp~R S1 | 0.24±0.13 | 0.23±0.17 | 0.445 | 0.73 |
| R Fp~L M1 | 0.23±0.14 | 0.20±0.19 | 0.480 | 0.72 |
| R Fp~R M1 | 0.16±0.20 | 0.22±0.15 | -0.771 | 0.61 |
| R Fp~L Association area | 0.31±0.13 | 0.21±0.21 | 1.623 | 0.53 |
| R Fp~R Association area | 0.23±0.18 | 0.18±0.23 | 0.648 | 0.64 |
| L DLPFC~R DLPFC | 0.43±0.28 | 0.26±0.24 | 1.542 | 0.53 |
| L DLPFC~L S1 | 0.35±0.23 | 0.19±0.17 | 1.835 | 0.53 |
| L DLPFC~R S1 | 0.29±0.21 | 0.21±0.19 | 0.865 | 0.58 |
| L DLPFC~L M1 | 0.22±0.23 | 0.11±0.27 | 0.976 | 0.55 |
| L DLPFC~R M1 | 0.24±0.31 | 0.16±0.17 | 0.904 | 0.58 |
| L DLPFC~L Association area | 0.33±0.25 | 0.12±0.19 | 2.176 | 0.53 |
| L DLPFC~R Association area | 0.24±0.24 | 0.14±0.12 | 1.469 | 0.53 |
| R DLPFC~L S1 | 0.33±0.23 | 0.25±0.23 | 0.999 | 0.55 |
| R DLPFC~R S1 | 0.25±0.20 | 0.25±0.21 | 0.073 | 0.94 |
| R DLPFC~L M1 | 0.16±0.30 | 0.24±0.22 | -0.753 | 0.61 |
| R DLPFC~R M1 | 0.16±0.18 | 0.21±0.16 | -0.722 | 0.61 |
| R DLPFC~L Association area | 0.31±0.20 | 0.19±0.22 | 1.375 | 0.53 |
| R DLPFC~R Association area | 0.21±0.15 | 0.23±0.23 | -0.325 | 0.80 |
| L S1~R S1 | 0.46±0.36 | 0.30±0.26 | 1.419 | 0.53 |
| L S1~L M1 | 0.66±0.49 | 0.52±0.33 | 0.799 | 0.61 |
| L S1~R M1 | 0.42±0.44 | 0.34±0.30 | 0.625 | 0.64 |
| L S1~L Association area | 0.66±0.37 | 0.51±0.39 | 1.186 | 0.54 |
| L S1~R Association area | 0.50±0.38 | 0.32±0.34 | 1.638 | 0.53 |
| R S1~L M1 | 0.49±0.56 | 0.35±0.36 | 0.977 | 0.55 |
| R S1~R M1 | 0.54±0.43 | 0.45±0.35 | 0.537 | 0.68 |
| R S1~L Association area | 0.37±0.38 | 0.31±0.19 | 0.572 | 0.67 |
| R S1~R Association area | 0.51±0.36 | 0.41±0.34 | 0.778 | 0.61 |
| L M1~R M1 | 0.45±0.47 | 0.22±0.39 | 1.237 | 0.54 |
| L M1~L Association area | 0.49±0.43 | 0.44±0.35 | 0.357 | 0.79 |
| L M1~R Association area | 0.42±0.47 | 0.26±0.32 | 1.060 | 0.55 |
| R M1~L Association area | 0.36±0.49 | 0.16±0.34 | 1.217 | 0.54 |
| R M1~R Association area | 0.43±0.54 | 0.39±0.22 | 0.280 | 0.82 |
| L Association area~R Association area | 0.56±0.46 | 0.28±0.37 | 1.949 | 0.53 |
